# 1 Nested phylogenetic conflicts, combinability, and deep phyloge- 2 nomics in plants

3 Stephen A. Smith<sup>1</sup>, Nathanael Walker-Hale<sup>1,2</sup>, Joseph F. Walker<sup>1</sup>, Joseph W. Brown<sup>3</sup>

4 *Author Affiliation:* <sup>1</sup>*Department of Ecology and Evolution Biology, University of Michigan,* <sup>2</sup>*Department*  
5 *of Plant Sciences, University of Cambridge,* <sup>3</sup>*Department of Animal and Plant Sciences, University of*  
6 *Sheffield*

7 *Keywords:* *phylogenomics, phylogenetics, angiosperms, gene-tree conflict, genomics, coalescent*

## 8 Abstract

9 Studies have demonstrated that pervasive gene tree conflict underlies several important phylogenetic  
10 relationships where different species tree methods produce conflicting results. Here, we present a means  
11 of dissecting the phylogenetic signal for alternative resolutions within a dataset in order to resolve  
12 recalcitrant relationships and, importantly, identify relationships the dataset is unable to resolve. These  
13 procedures extend upon methods for isolating conflict and concordance involving specific candidate  
14 relationships, and can be used to identify systematic error and disambiguate sources of conflict among  
15 species tree inference methods. We demonstrate these procedures on a large phylogenomic plant dataset.  
16 Our results support the placement of *Amborella* as sister to the remaining extant angiosperms, the  
17 monophyly of extant gymnosperms, and that Gnetales are sister to pines. Several other contentious  
18 relationships, including the resolution of relationships within both the bryophytes and the eudicots,  
19 remain uncertain given the low number of supporting gene trees. To address whether concatenation of  
20 filtered genes amplified phylogenetic signal for particular relationships, we implemented a combinatorial  
21 heuristic to test combinability of genes. We found that nested conflicts limited the ability of data  
22 filtering methods to fully ameliorate conflicting signal amongst gene trees. These analyses confirmed  
23 that the underlying conflicting signal does not support broad concatenation of genes. Our approach  
24 provides a means of dissecting a specific dataset to address deep phylogenetic relationships while  
25 highlighting the limitations of the dataset.

## 26 Introduction

27 Over the last few years, we have come to understand that phylogenetic conflict is common and presents  
28 several analytical challenges. Researchers have amassed large genomic and transcriptomic datasets  
29 meant to resolve fundamental phylogenetic relationships in plants (Wickett et al. 2014), animals (Jarvis  
30 et al. 2014; Dunn et al. 2008; Simion et al. 2017; Whelan et al. 2017), fungi (Shen et al. 2016),  
31 and bacteria (Ahrenfeldt et al. 2017). While the goals of these data collection efforts have been to  
32 increase the overall phylogenetic support, analyses have demonstrated that different datasets and  
33 analytical approaches often reconstruct strongly-supported but conflicting relationships (Feuda et al.  
34 2017; Walker et al. 2018; Shen, Hittinger, and Rokas 2017). Underlying these discordant results are  
35 strongly conflicting gene trees (Smith et al. 2015). In some cases, one or two “outlier” genes with  
36 large likelihood differences between alternative relationships can drive results (Shen, Hittinger, and  
37 Rokas 2017; Brown and Thomson 2016; Walker, Brown, and Smith 2018). Detailed gene tree analysis

38 of phylogenomic datasets is essential to identifying and analyzing overall gene tree conflict and outlier  
39 genes.

40 Phylogenomic datasets are often analyzed as concatenated supermatrices or with coalescent gene-  
41 tree / species tree methods. Supermatrix methods were, in part, developed to amplify the strongest  
42 phylogenetic signal. However, it has long been understood that the “total evidence” paradigm (Kluge  
43 1989), where the true history will ‘win out’ if enough data are collected, is untenable. Genes with real  
44 and conflicting histories are expected within datasets due to biological processes like hybridization and  
45 incomplete lineage sorting (ILS) (Maddison 1997) in addition to outlying genes and sites as mentioned  
46 above (Shen, Hittinger, and Rokas 2017; Brown and Thomson 2016; Walker, Brown, and Smith 2018).  
47 “Species tree” inference accommodates for gene tree conflict due to ILS (Edwards, Liu, and Pearl 2007;  
48 Liu et al. 2009; Edwards 2009; Edwards et al. 2016) and is often conducted alongside concatenated  
49 supermatrix analyses. Differences in the results from these two approaches are often explained by  
50 the differences in assumptions each makes. The concatenated supermatrix allows for mixed molecular  
51 models and gene-specific branch lengths but assumes a single underlying tree topology common to  
52 all genes. This procedure is known to perform poorly in the presence of extensive ILS. Coalescent  
53 approaches, depending on the implementation, may assume that all conflict is the result of ILS (but  
54 see Boussau et al. (2013) and Ané et al. (2006)), that all genes evolved under selective neutrality and  
55 constant effective population size, that all genes contain enough information to properly resolve nodes,  
56 and that gene trees are estimated accurately (Springer and Gatesy 2016).

57 While supermatrix and coalescent methods perform well in many scenarios, when unresolved nodes  
58 or discordance between species trees remain after large data collection efforts, researchers can further  
59 examine the processes leading to conflict or further dissect the phylogenetic signal within datasets. For  
60 example, Bayesian methods have been developed that incorporate processes in addition to ILS that  
61 lead to gene tree discordance (Ané et al. 2006; Boussau et al. 2013). However, these methods are often  
62 computationally intractable for current genomic datasets and may not handle systematic error well.  
63 Recently, network methods that scale to large datasets have been developed (Wen et al. 2018,@snaq),  
64 but these do not allow for dissecting signal within datasets. Filtering approaches where subsets of  
65 genes are analyzed based on model similarity or the relationships displayed by the genes (Chen, Liang,  
66 and Zhang 2015; Shen et al. 2016; Smith, Brown, and Walker 2018), help to enable computational  
67 tractability and distill signal. For example, Chen, Liang, and Zhang (2015) filtered for question-specific  
68 genes in the phylogeny of jawed vertebrates using two methods: one where only gene trees capable of  
69 supporting one of three resolutions for a given relationship were included in the analysis, and another  
70 where only gene trees which agreed with a widely-accepted control locus were retained for the analysis.  
71 Researchers have also examined alternative phylogenetic hypotheses in order to isolate the supporting  
72 signal (Shen, Hittinger, and Rokas 2017; Brown and Thomson 2016; Walker, Brown, and Smith 2018).

73 In plants, several large data collection efforts aimed at resolving difficult nodes have found extensive  
74 conflicts (Smith et al. 2015; Walker et al. 2018, 2017; Wickett et al. 2014). Resolution of these clades  
75 is not only important for systematics, but crucial to an evolutionary understanding of key biological  
76 questions. For example, the relationships among the lineages of bryophytes (i.e., hornworts, liverworts,  
77 and mosses) remain unclear despite extensive data collection efforts (Wickett et al. 2014; Puttick et al.  
78 2018). One of the most heavily debated lineages in plant phylogenetics is the monotypic *Amborella*, the  
79 conflicting placement of which alters our understanding of early flowering plant evolution. *Amborella*  
80 has been inferred as sister to Nymphaeales, as sister to all angiosperms, or as sister to the remaining  
81 Angiosperms excluding Nymphaeales (Xi et al. 2014). The resolution of *Amborella*, along with other

82 contentious relationships across land plants, would provide greater confidence in our understanding of  
83 the evolution of early reproductive ecology, the evolution of floral development, and the life history of  
84 early land plants (Feild et al. 2004; Sauquet et al. 2017).

85 We conducted a detailed analysis of nested phylogenomic conflict and signal across a phylogenomic  
86 dataset in hopes of presenting a computationally tractable and practical way to examine contentious  
87 relationships. We extended methods for examining phylogenetic alternatives and present an approach  
88 that can be widely applied to empirical datasets to determine the support, or lack thereof, for  
89 phylogenetic hypotheses. We applied these methods to a large plant genomic dataset (Wickett et al.  
90 2014). We identified systematic error, nested conflicting relationships, support for alternative resolutions,  
91 and we present a practical means to test the topological combinability of subsets of genes based on a  
92 combinatorial heuristic and information criteria statistics. By taking this broad information-centric  
93 approach, we hope to shed more light on the evolution of plants and present a tractable approach for  
94 dissecting signal with broad applicability for phylogenomic datasets across the Tree of Life.

## 95 **Materials and Methods**

### 96 **Datasets**

97 We analyzed the Wickett et al. (2014) dataset of transcriptomes and genomes covering plants available  
98 from [http://mirrors.iplantcollaborative.org/onekp\\_pilot](http://mirrors.iplantcollaborative.org/onekp_pilot). There were several different filtering methods  
99 and approaches used in the original manuscript and, based on conversations with the corresponding  
100 author, we analyzed the filtered nucleotide dataset with third codon positions removed. These sites  
101 were removed because of problems with excessive variation and GC content that caused problems with  
102 the placement of the lycophytes (Wickett et al. 2014). This dataset consisted of 852 aligned genes. We  
103 did not conduct any other filtering or alteration of these data before conducting the analyses performed  
104 as part of this study.

### 105 **Phylogenetic analyses**

106 We inferred gene trees for each of the 852 genes using IQ-TREE (v. 1.6.3; Nguyen et al. 2014). We used  
107 the GTR+G model of evolution and calculated maximum likelihood trees along with SH-aLRT values  
108 (Guindon et al. 2010). For all constrained analyses, we conducted additional maximum likelihood  
109 analyses with the same model of evolution but constrained on the relationship of interest, although the  
110 rest of the tree topology was free to vary.

### 111 **Conflict analyses**

112 We conducted several different conflict analyses. First, we identified the congruent and conflicting  
113 branches between the maximum likelihood gene trees (ignoring branches that had less than 80% SH-  
114 aLRT (Guindon et al. 2010)0, and the maximum likelihood species tree from the original publication  
115 (Fig. 2; Wickett et al. 2014). These analyses were conducted using the program bp available from  
116 <https://github.com/FePhyFoFum/gophy>. We placed these conflicting and supporting statistics in  
117 a temporal context by calculating the divergence times of each split based on the TimeTree of Life  
118 (Hedges, Dudley, and Kumar 2006; Hedges et al. 2015). By examining the dominant conflicting

119 alternatives, we established which constraints to implement and compare for further analyses. Because  
120 the gene regions contain partially overlapping taxa, automated discovery of all conflicting relationships  
121 concurrently can be challenging. To overcome these challenges, we examine each constraint individually.

122 To determine the difference in the log-likelihood (lnL) values among conflicting resolutions, we conducted  
123 the constrained phylogenetic analyses (with parameters described in the *Phylogenetic analyses* section  
124 above) and compared the lnL values of the alternative resolutions. We then examined those results  
125 that had a difference in the lnL of greater than 2, considering this difference as statistically significant  
126 (Edwards 1984). For each gene, we noted the relationship with the highest log-likelihood and summed  
127 the difference of that and the second best relationship (DlnL) across all genes.

128 We also examined nested conflicts. In particular, for the genes identified as supporting the dominant  
129 relationship of the eudicot lineages, we examined the distribution of conflict. We then examined those  
130 genes that supported both the eudicot lineages and the relationship of *Amborella* as sister to the rest  
131 of angiosperms. Finally, of those genes, we determined which supported the alternative gymnosperm  
132 relationships. We conducted each of these nested analyses using the same methods as described above.

### 133 **Combinability test**

134 We describe a simple but fast procedure for testing the combinability within a dataset based on gene  
135 tree similarity and information criteria (Fig. 1). A typical concatenated phylogenetic analysis assumes  
136 that the entire alignment used to calculate the tree was generated with the same underlying topology.  
137 When that is not the case, the likelihood of the tree using the entire alignment will be lower than the  
138 when considering the gene regions separately. It follows that those genes that should be combined (i.e.,  
139 concordant histories) will have more similar gene trees than those that should be considered separately  
140 (i.e., conflicting histories). To determine similarity between gene trees, we calculated the pairwise  
141 weighted Robinson-Foulds (RFW) distance (Robinson and Foulds 1981). We then constructed a graph  
142 where genes are nodes and edges are the weights between gene trees based on RFW. Then, beginning  
143 with the strongest edge, we tested for the combinability between the two connecting nodes. If they  
144 were combinable, based on the information criteria discussed below, we merged the nodes, along with  
145 the connecting edges for each.

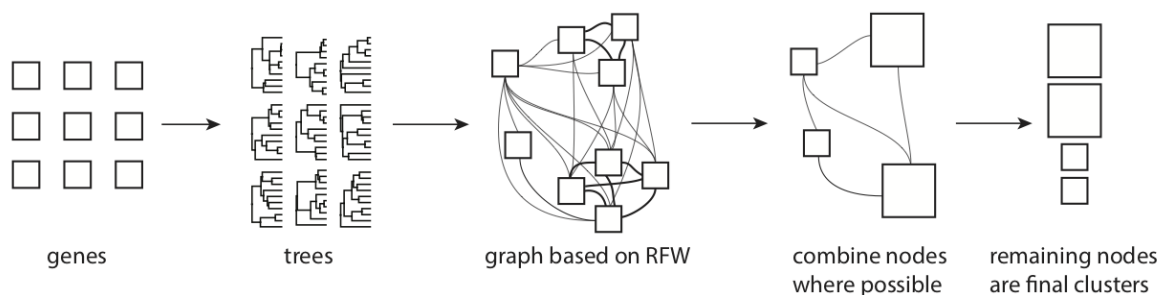

Figure 1: Procedure described in the methods section. Gene trees are constructed for genes and weighted Robinson-Foulds distances are calculated between gene trees. A graph is constructed with genes as nodes and edge weights from the weighted distances. The strongest edges are then tested for combinability and combined if possible. The final nodes in the graph are the final clusters (i.e., clusters that cannot be justifiably combined).

146 Non-nested likelihood-based analyses that have different numbers of parameters cannot be compared

147 directly. Instead, in the likelihood framework, information criteria are commonly used to accommodate  
148 and penalize for the increase in the number of parameters to prevent overfitting. The Akaike Information  
149 Criterion (AIC; Akaike 1973), the AIC with the correction for dataset size (AICc; see Burnham and  
150 Anderson 2003), and the Bayesian Information Criterion (BIC; Schwarz 1978) may all be used to  
151 compare likelihood scores that are produced from different numbers of parameters. Each of these  
152 criteria has different assumptions and different potential utility. Here, we examine the differences in  
153 considering AICc and BIC.

154 The number of parameters for a single gene in a phylogenetic analysis include those for the molecular  
155 model (e.g.,  $GTR = 8, 5$  for substitution rates (the 6 rates are expressed relative to one arbitrary rate  
156 that is fixed as 1.0) and 3 for stationary nucleotide frequencies, with an additional 1 when including  
157 gamma-distributed rate variation) and the branch lengths of the unrooted phylogenetic tree ( $2n - 3$ ).  
158 There are several ways by which multiple genes may be combined. For example, often molecular models  
159 are allowed to vary between these genes, or partitions. It is possible to test whether the genes should  
160 share models and programs exist to conduct such tests (e.g. PartitionFinder: Lanfear et al. (2016)). If  
161 models vary between gene regions, then for a  $x$  gene dataset, the number of molecular model parameters  
162  $y$  would be  $x \times y$ . The parameterization of branch lengths has several options: shared ( $2n - 3$ ), exactly  
163 proportional ('scaled';  $(2n - 3) + (x - 1)$ ), and independent ( $(2n - 3) \times x$ ). Here, we considered the  
164 molecular models to be independent between gene regions and tested both scaled and independent  
165 branch lengths.

166 With these considerations, the tree comparison calculation proceeded as follows: for each gene, calculate  
167 the information criterion of the ML gene tree. Next, sum the information criterion statistic for the  
168 set of genes being tested. Further, concatenate the genes and calculate the information criterion for  
169 the ML tree. The genes may have different model parameters or branch lengths (shared, scaled, or  
170 independent), but they share the same topology. Lastly, compare the values of the information criterion  
171 for the summed gene trees and the concatenated genes. If the concatenated genes have a lower value  
172 of the information criterion than the summed gene trees, accept the combined genes and continue to  
173 the next comparison. If genes are already a member of a merged set, then compare the new gene to  
174 the merged set. Given this procedure, our algorithm is a greedy clustering method. Our approach  
175 is somewhat similar to the GARD method for detection of recombination breakpoints (Kosakovsky  
176 Pond et al. 2006a, 2006b). Here, the 'breakpoints' are the ends of the gene partitions, and we allow  
177 full maximum likelihood inference of the topologies of each partition, as well as selection of different  
178 branch length models and information criteria. Furthermore, instead of a genetic algorithm, we use  
179 tree distances to select which pairs to test. These methods are implemented in an open source python  
180 package, phyckle, available at <https://github.com/FePhyFoFum/phyckle>.

## 181 Simulations

182 We verified the performance of our combinatorial method using a variety of simulations across tree  
183 depths, branch length heterogeneity, topological variation, and model variation. Each simulation is  
184 described below. In general, we attempted to simplify the simulations in order to isolate the specific  
185 element being tested in order to better describe the expected behavior. While alignments were simulated  
186 under differing models, all clustering tests were conducted using GTR+G as this is typical of empirical  
187 analyses. For all simulations below, trees were simulated using `pxbdsim` from the `phyx` package (Brown,  
188 Walker, and Smith 2017) and alignments were generated using INDELible (Fletcher and Yang 2009).

189 *Comparing information criteria and branch length models*—In order to determine the efficacy of different  
190 information criteria as well as different branch length models, we conducted several simulation analyses.  
191 For each simulation, we generated a tree from a pure birth model with 25 tips and then three gene  
192 regions under JC model of evolution with 1000 sites each. This analysis was conducted with 100  
193 replicates. While the JC model of evolution is, perhaps, overly simplistic, we aimed to isolate the factors  
194 that caused genes to be considered separate or combined. We test more complex models below. Tree  
195 heights were tested for 0.05, 0.25, 0.75, and 1.25. We also conducted tests where branches could vary  
196 between gene regions. For each gene region, the species tree branch lengths were perturbed randomly  
197 with a sliding window of 0.01, 0.05, and 0.1, so  $U(x - w, x + w)$ . We examined scaled and independent  
198 branch length models with both BIC and AICc.

199 *Examining the impact of branch differences*—The above tests examined variation between simulated  
200 genes involving branch length heterogeneity and model complexity, but all had the same underlying  
201 topology. We also examined the impact of having different underlying topologies between gene regions.  
202 To do this, we simulated a pure birth tree of 25 tips and a tree depth of 0.5 and simulated two gene  
203 regions under this model. Then for one additional gene region, we chose one node randomly and  
204 swapped nearest neighbors and then simulated gene regions. This resulted in three gene regions with two  
205 different underlying topologies. The difference in the underlying topologies varied from one swapping  
206 move to five swapping moves. All genes trees also had branch lengths perturbed with branch length  
207 heterogeneity of 0.01 as described above.

208 *Examining the impact of different models on different genes*—In order to examine whether different  
209 models may cause the gene regions to be considered separate we conducted similar simulations to those  
210 described above but with distinct substitution models applied to individual gene regions. Two gene  
211 regions were simulated for each of three substitution models (i.e., six gene regions total), each with 1000  
212 bases and the same underlying pure birth topology of 25 taxa and tree depth of 0.5. Branch length  
213 heterogeneity varied from 0.01, 0.05, and 0.1. The first two gene regions were evolved under JC, the  
214 second set of two gene regions under HKY with  $\kappa = 2.5$ , proportion of invariable sites = 0.25,  $\Gamma = 0.5$ ,  
215 number of  $\Gamma$  categories = 10, and state frequencies of 0.2, 0.3, 0.1, 0.4 for A, C, G, and T, respectively,  
216 and the third set of two gene region under HKY with  $\kappa = 1.5$ , proportion of invariable sites = 0.25,  
217  $\Gamma = 0.5$ , number of  $\Gamma$  categories = 10, and state frequencies of 0.1, 0.4, 0.3, 0.2. Two gene regions were  
218 simulated for each model in order to verify that those two continued to be clustered together regardless  
219 of how the separate models clustered. This test was not intended to be comprehensive as variation in  
220 molecular models in relation to information criteria has already been thoroughly explored (e.g., Lanfear  
221 et al. 2016; Seo and Thorne 2018). Instead, we aimed to better understand the conditions under which  
222 variation in molecular model would result in consideration as completely separate analyses.

223 *Examining the impact of missing taxa*—Because genes often do not have completely overlapping taxa, we  
224 conducted simulations where some taxa may be missing from each gene region. For these simulations,  
225 25 taxon pure birth trees were generated and three gene regions of 1000 bases each were simulated.  
226 Then from one to three tips were randomly removed from one gene. We also conducted simulations  
227 where from one to three tips were randomly removed from each of the three genes. Random taxa were  
228 removed from each gene and so some genes would have the same taxa removed and others would not.  
229 All genes trees also had branch lengths perturbed with branch length heterogeneity of 0.01 as described  
230 above.

231 *Examining the potential for snowballing*—Based on initial observations, we hypothesized that the use  
232 of particular combinations of model and information criteria may lead to genes being erroneously

233 combined because of the size of the cluster they were compared to, i.e. that clusters would snowball  
234 in size. We assessed this possibility by simulating 1000 base-pair alignments under a JC model of  
235 evolution on a 25-taxon pure birth tree with a tree depth of 0.5, and comparing these alignments to  
236 another alignment simulated on a tree three NNI-moves away. In each iteration, we increased the  
237 number of alignments simulated on the same tree. Thus iteration one compared one gene on one tree  
238 and another on a tree three NNI moves away, while iteration two compared two genes simulated on  
239 one tree with another on a tree three NNI moves away, and so on. Each comparison was repeated 100  
240 times for linked (proportionally scaled) and unlinked (independent) branch lengths and analyzed with  
241 both AICc and BIC.

## 242 **Empirical Demonstration**

243 For demonstration purposes, we did not conduct exhaustive testing of combinability of the entire  
244 Wickett et al. (2014) dataset. Instead, we conducted these tests on two gene sets that supported the  
245 eudicot relationship. First, we tested the set of genes that supported the eudicot relationship in the  
246 ML tree that did not have a branch length longer than 2.5 and did not have outgroup taxa falling  
247 in the ingroup. Long branch lengths (e.g., >2.5 substitutions per site) suggest multiple substitutions  
248 at *each* site and therefore little to no remaining phylogenetic information (e.g., systematic error or  
249 extremely rapid rates of evolution). Second, we tested the set of genes that did not only support the  
250 relationship in the ML tree but also displayed the relationship in the ML gene tree with SH-aLRT  
251 support higher than 80 and with no outlying branch lengths or outgroup taxa falling in the ingroup.  
252 These control methods echo the classes of filtering evoked in Chen, Liang, and Zhang (2015), that of  
253 non-specific data filtering (branch length, support values) and ‘node-control’ (outgroup relationships,  
254 eudicot relationships).

255 Clustering analyses were conducted using IQ-TREE with AICc and the `-spp` option for scaled branch  
256 lengths partitions, as simulations demonstrated that it split the most accurately based on conflicting  
257 topologies (see *Results*).

258 We compared the results of our analyses to the PartitionFinder ‘greedy’ algorithm implemented in  
259 IQ-TREE using the option `-m MERGE`, specifying the GTR+G model and assessing partitions with the  
260 edge-linked proportional model with `-spp`. We compared the individual gene trees of each merged  
261 partition in IQ-TREE with `-spp` and `-m GTR+G` and for comparison assessed the optimal partitioning  
262 scheme on the full data similarly with `-spp` and `-m GTR+G`. In addition we compared the results of  
263 treating the clusters from the combination procedure as an optimal partitioning scheme, using `-spp`  
264 and `-m GTR+G`. In each case AICc was used for a direct comparison to the results of our method.

## 265 **Results**

### 266 **Conflict analyses**

267 We compared gene trees (Fig. 1) based on the concatenated maximum likelihood (ML) analysis from  
268 Wickett et al. (2014) and found that both gene tree conflict and support varied through time with  
269 support increasing toward the present (Fig. 2). We aimed to resolve contentious relationships, with a  
270 focus on those that have either been debated in the literature or been considered important in resolving  
271 key evolutionary questions, to the best of the ability of the underlying data (Table 1).

272 The massive scale of genomic datasets can cause substantial noise that is often difficult to identify  
 273 when taking the dataset as a whole. When analyzing specific genes, we found that several conflicting  
 274 relationships were the result of systematic error in the underlying data. In order to minimize the  
 275 impact of systematic error on the estimation of relationships, we excluded obvious errors where possible.  
 276 For example, we found 258 of 852 gene trees contained non-land plant taxa that fell within the land  
 277 plants. While these errors may not impact the estimation of relationships within eudicots, they will  
 278 impact the estimation of relationships at the origin of land plants. Therefore, we excluded gene trees  
 279 for which there was not previously well established monophyly of the focal taxa (i.e., involving the  
 280 relationship of interest). We also identified 68 gene trees that possessed very long estimated branch  
 281 lengths ( $> 2.5$  expected substitutions per site). We conservatively considered these to contain potential  
 282 errors in homology (Yang and Smith 2014). While these genes demonstrate patterns associated with  
 283 systematic error, they also likely contain information for several relationships. However, some error  
 284 may be the result of misidentified orthology that will mislead estimation of phylogenetic relationships,  
 285 even if this error may not impact all relationships inferred by the gene. Therefore, to minimize sources  
 286 of systematic error, we took a conservative approach and excluded these genes from additional analyses.  
 287 We explored both numbers of gene trees and differences in log-likelihoods for several key relationships.  
 288 In some cases both number of gene trees and differences in log-likelihood support the same resolution,  
 289 as was the case for the monophyly of Gymnosperms. However, other relationships are more equivocal or  
 290 contradictory. For example, Gnetales and conifers as sisters (“Gnetifers”) is supported by more genes,  
 291 but Gnetales and Pines as sisters (“Gnepine”) is supported by differences in log-likelihood (Table 1).

292 *Table 1. Comparison of the number of genes and the difference in the likelihood (DlnL) with relationships*  
 293 *ordered based on support. \* indicates relationships present in the ML tree.*

| Major clade      | Resolutions              | Genes | Genes ( $> 2\ln L$ ) | DlnL   | DlnL $> 2$ |
|------------------|--------------------------|-------|----------------------|--------|------------|
| Bryophytes       | Hornworts sister*        | 110   | 83                   | 677.6  | 654.1      |
|                  | Liverworts sister        | 56    | 41                   | 294.1  | 280.8      |
|                  | Mosses+liverworts        | 81    | 40                   | 228.9  | 190.2      |
|                  | All monophyly            | 81    | 37                   | 185.3  | 148.5      |
| Gymnosperms      | monophyly*               | 288   | 264                  | 7259.0 | 7233.8     |
|                  | <i>Gnetum</i> sister     | 45    | 31                   | 229.8  | 216.0      |
|                  | <i>Cycas</i> sister      | 39    | 18                   | 120.3  | 105.2      |
| Gymno relat.     | Gnepine*                 | 107   | 85                   | 1017.2 | 994.4      |
|                  | conifers                 | 93    | 79                   | 800.0  | 787.2      |
|                  | Gnetifers                | 134   | 55                   | 288.1  | 217.8      |
|                  | Gnetales sister          | 76    | 40                   | 211.2  | 176.3      |
| <i>Amborella</i> | <i>Amborella</i> sister* | 184   | 152                  | 1501.1 | 1470.0     |
|                  | <i>Amborella+Nuphar</i>  | 118   | 75                   | 564.2  | 526.3      |
|                  | <i>Nuphar</i> sister     | 111   | 62                   | 392.2  | 345.2      |
| Eudicots         | Magnoliids+eudicots*     | 114   | 98                   | 1223.4 | 1204.3     |
|                  | Monocots+eudicots        | 66    | 49                   | 541.5  | 526.5      |
|                  | Monocots+magnoliids      | 90    | 58                   | 453.3  | 425.5      |



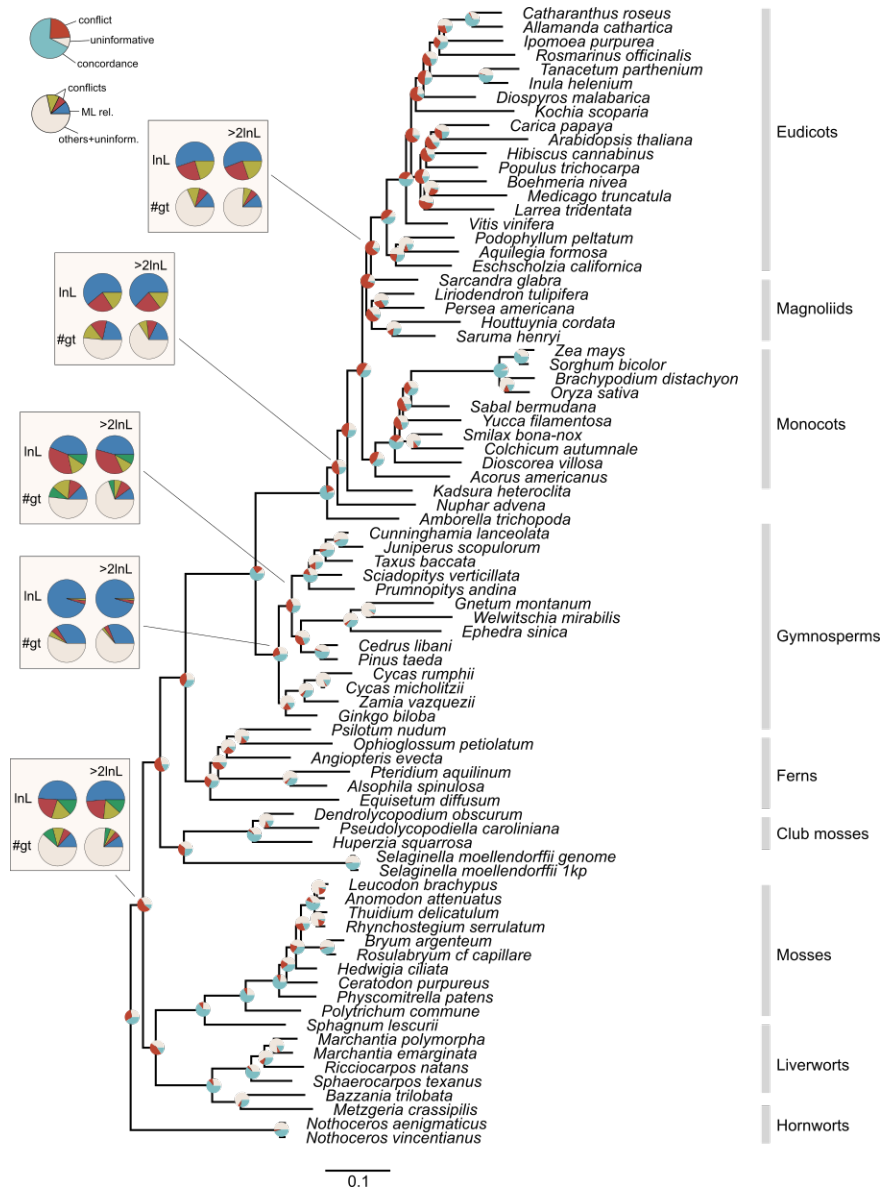

Figure 2: Phylogeny of land plants with pie charts at nodes illustrating conflict, concordance, and informativeness of the gene tree set without any filtering. Inset boxes show summed differences in log likelihoods (top row) and the number of gene trees (bottom row) that support the relationship shown in the tree and the dominant conflicting relationships. Right pie charts in the inset box show results when only differences greater than 2 log likelihoods are considered. See also Table 1.

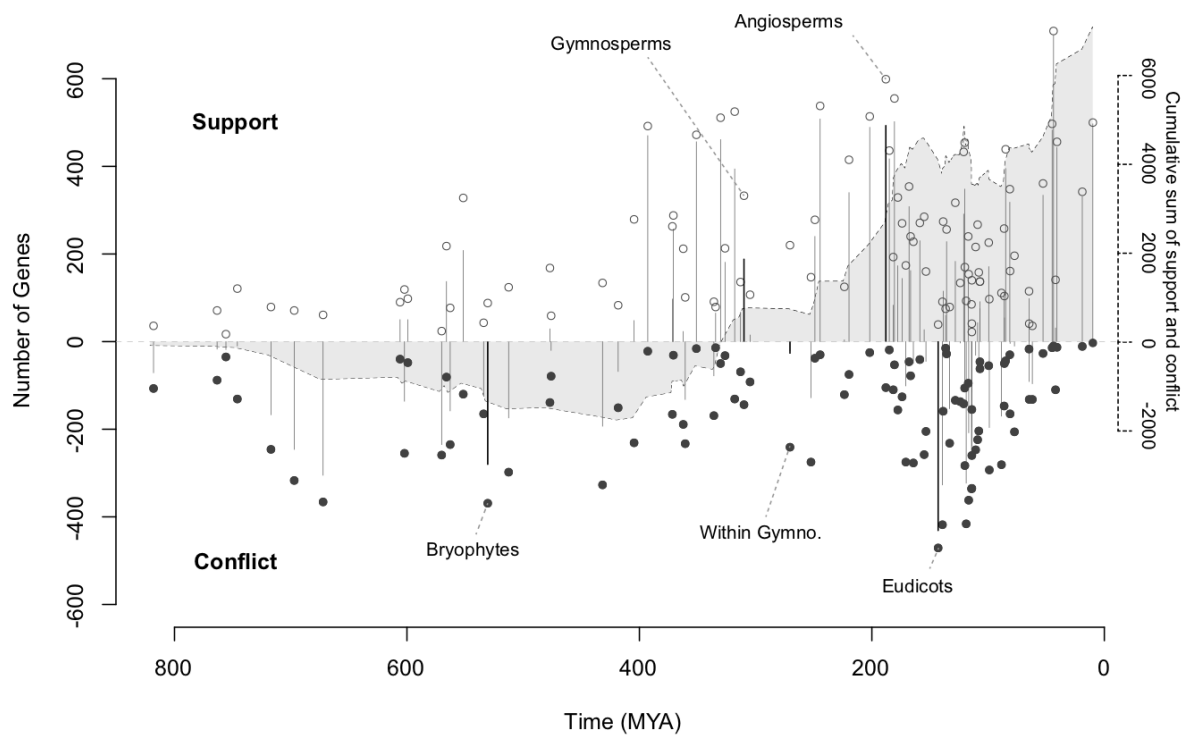

Figure 3: Examination of support and conflict in relation to time across all nodes with node ages taken from TimeTree (Hedges, Dudley, and Kumar 2006; Hedges et al. 2015). The differences between support and conflict are noted with vertical lines. The cumulative sum of support and conflict through time is noted in solid grey. Focal nodes from Fig. 2 are identified.

## 294 Nested analyses

295 Given the variation in support and conflict through time (Fig. 3), many genes that contain signal for a  
296 particular relationship may disagree with the resolution at other nodes. To examine these patterns of  
297 nested conflict, we examined the genes that support the resolution of the eudicot relationships (Fig. 4).  
298 In a set of 127 genes which supported the eudicot relationships recovered in the original ML analysis,  
299 98 survived filtering for outgroup placement, branch length, and support with a statistically significant  
300 difference in lnL ( $> 2$ ; Edwards 1984). 63 of these genes supported the monophyly of gymnosperms,  
301 and among those 63 only 25 supported a sister relationship between pines and *Gnetum*.

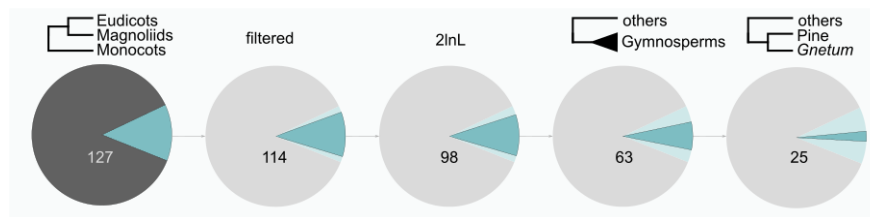

Figure 4: Nested patterns of support with genes associated with the resolution of eudicots. From left to right are shown the genes that support eudicots as sister to magnoliids (far left), those genes filtered as not having any outgroup errors or long branch lengths, those genes that support the resolution by at least 2lnL, those genes that support monophyletic gymnosperms, and finally those genes that support the Gnepine relationship.

## 302 Simulations of combinability

303 The procedure described here consists of two components: the information criterion for testing model  
304 complexity and the hill-climbing greedy clustering algorithm. First we conducted analyses to compare  
305 the performance of the difference information criteria measures (Fig. 5). In our tests, BIC with scaled  
306 branch lengths performed the best overall while AICc with scaled branch lengths performed well when  
307 branch length heterogeneity was low but poorly when branch length heterogeneity was medium to high.  
308 AICc with independent branch lengths tended to overfit when tree depths were higher but was more  
309 consistent across a range of branch length heterogeneity than any other information criterion. BIC with  
310 independent branch lengths (not shown) failed to recover any clusters and therefore was not considered  
311 further. High branch length heterogeneity generally resulted in overfitting. Because of the propensity  
312 of AICc with independent branch lengths to erroneously split clusters with both increasing tree depth  
313 and low levels of branch length heterogeneity, we did not consider it further.

314 Phylogenomic datasets often have only partially overlapping taxa sets for each gene, therefore we tested  
315 the influence of this in two ways (Fig. 5B). First, we randomly removed from one to three taxa for a  
316 single gene. These results demonstrate that the procedure will tend to overfit as the number of missing  
317 taxa increases. AICc with scaled branch lengths was highly sensitive to missing taxa, with between  
318 33% and 87% overfitting for missing taxa in one gene and only one replicate correctly recovering one  
319 cluster for the highest amount of missing taxa in all genes. BIC with scaled branch lengths was less  
320 sensitive to missing taxa, with between 4% and 12% overfitting for missing taxa in one gene, and up to  
321 52% overfitting for missing taxa in all genes.

322 The results above all had the same underlying species tree topology for each gene simulated. In order  
323 to determine not only whether the procedure overfitted models, we also examined the ability for the

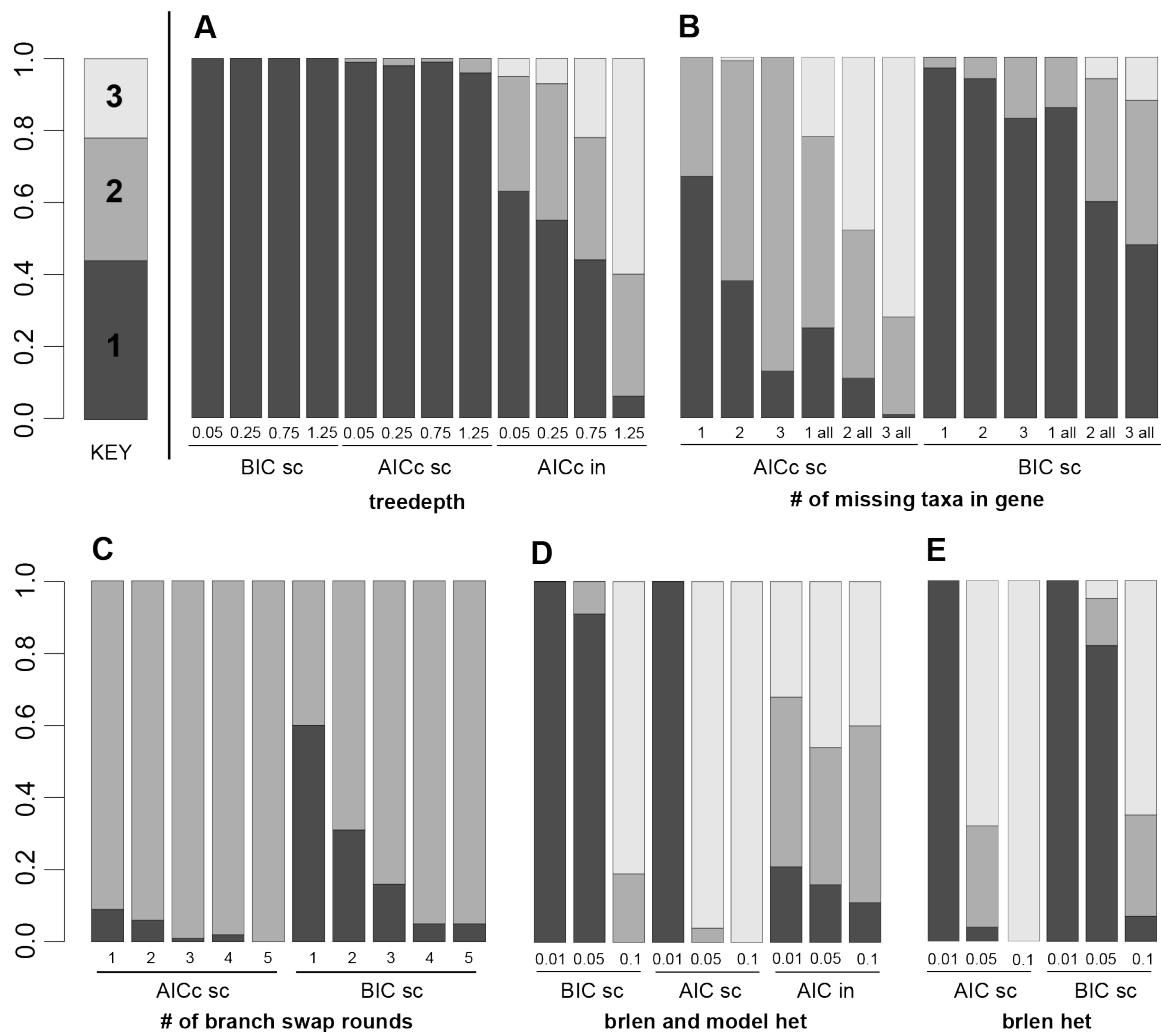

Figure 5: Simulations of clustering behaviour for the information criteria-based clustering under different models and data perturbation. ‘sc’ indicates that branch lengths are scaled (proportional) between gene regions, while ‘in’ indicates independent branch lengths. **A** performance of varied tree depths for three gene regions simulated on the same topology. Ideally all would recover one cluster. **B** performance for decreasing taxon overlap, with three gene regions simulated on the same topology but with one gene missing 1-3 taxa or with all genes missing 1-3 taxa. Ideally all would recover one cluster. **C** ability to detect topological differences amongst three gene regions, with two simulated on one topology and one simulated on a topology 1-5 NNI moves away. Ideally all would recover two clusters. **D** performance of varied branch length heterogeneity for three gene regions simulated on the same topology using the same model. Ideally all would recover one cluster. **E** performance for three gene regions simulated under different models and increasing branch length heterogeneity on the same topology. Ideally all would recover one cluster.

324 procedure to correctly break up gene regions when underlying topologies differed (Fig. 5C). As the  
325 simulations were conducted with two topologies differing from one to five NNIs, we expected the  
326 procedure to identify two clusters. We found that AICc with scaled branch lengths was much more  
327 sensitive to topological differences, with a highest error of 9% of replicates, and perfect recovery at five  
328 NNIs. BIC with scaled branch lengths tended to underfit, with error rates up to 60%, and producing  
329 two clusters in 5% of replicates even at five NNIs.

330 While isolating the behavior of the information criteria in relation to tree depth and branch length  
331 heterogeneity is helpful, it is likely that most datasets will have variation in substitution models between  
332 genes as well (Fig. 5E). We found that the BIC with scaled branch lengths was mostly robust to model  
333 variation except in the presence of large branch length heterogeneity (i.e., 10% of total tree height).  
334 AICc with scaled branch lengths was prone to overfitting based on model discrepancies, particularly  
335 with increasing branch length heterogeneity, correctly recovering one cluster in all replicates with branch  
336 length heterogeneity of 0.01, but incorrectly recovering three clusters in all replicates with branch  
337 length heterogeneity of 0.01. The discrepancy between the branch length heterogeneity of 0.1 in this  
338 analysis and the one above reflect that there were six genes simulated in this case with two for each  
339 model versus three gene regions as above.

340 Initial observations from some empirical data suggested the potential for clusters to snowball in size.  
341 We therefore simulated increasing numbers of genes on the same topology and tested clustering them  
342 against a single gene simulated on a topology three NNI moves away. For an proportional branch length  
343 model, two clusters were obtained in all replicates regardless of the number of genes in the cluster, for  
344 both AICc and BIC. For an independent branch length model, two clusters were also obtained in all  
345 replicates for AICc and BIC (not shown).

### 346 **Empirical combinability of genes**

347 We greedily tested the combinability of genes sets based on Robinson-Foulds distances to examine  
348 whether genes can be justifiably concatenated despite heterogeneity in information content throughout  
349 the phylogeny. We refer to our method as the COMBination of datasets (COMB) method. Because  
350 our approach bears conceptual similarity to algorithms used to estimate the optimal partitioning  
351 schemes (e.g. PartitionFinder, Lanfear et al. 2012, 2016), we compared combinable subsets to those  
352 recommended by the implementation of the PartitionFinder algorithm in IQ-TREE (Kalyaanamoorthy  
353 et al. 2017, referred to as MERGE here). Since an exhaustive search of the entire dataset is intractable,  
354 we examined the combinability of those genes that support the eudicot lineages to be sister to the  
355 magnoliid lineages (Fig. 2). We conducted analyses of two sets of genes: those that support the  
356 relationship with greater than 2 lnL versus alternative relationships (98 genes; ‘CombinedSet’), and  
357 those that display the relationship in the ML gene tree and have SH-aLRT support greater than 80 (44  
358 genes; ‘MLSet’). These two sets were chosen because the first set was already examined as part of this  
359 study and the second is a typical cutoff used in standard systematics analyses (Guindon et al. 2010).

360 No method or gene set supported the concatenation of all genes that supported the focal eudicot  
361 relationship (see Table 2). The COMB method on the ‘CombinedSet’ supported concatenation of only  
362 two sets: one of three genes and one of two. The MERGE method supported merging partitions of  
363 46 genes out of 98 (see Table 2 for more details). MERGE supported partition merging for a much  
364 greater number of genes than COMB supported combination. The COMB and MERGE results did  
365 not contain any identical concatenated sets. We constructed phylogenies of each concatenated set and

366 compared the inferred topologies (Table 2). Despite filtering on the magnoliids as sister to eudicots  
 367 relationship, not all concatenated sets recovered this relationship with greater than 80 SH-aLRT. In  
 368 one case, a merged partition supported a contradictory relationship to the filtered one.

369 *Table 2. Comparison of partitioned subsets between combining strategies*

| Algorithm | Gene set | Genes | Sets                         | Partitioned Topology         | Subset Relationships                                           |
|-----------|----------|-------|------------------------------|------------------------------|----------------------------------------------------------------|
| MERGE     | combined | 98    | 20<br>(2x4,<br>2x3,<br>16x2) | magnoliids+eudicots<br>(100) | magnoliids+eudicots<br>(40%)                                   |
|           | ML       | 44    | 9 (1x4,<br>2x3,<br>6x2)      | magnoliids+eudicots<br>(100) | magnoliids+eudicots<br>(67%)<br><br>monocots+eudicots<br>(11%) |
| COMB      | combined | 98    | 2 (1x3,<br>1x2)              | magnoliids+eudicots<br>(100) | magnoliids+eudicots(100%)                                      |
|           | ML       | 44    | 5 (1x3,<br>4x2)              | magnoliids+eudicots<br>(100) | magnoliids+eudicots<br>(25%)                                   |

370 *Brackets following a partitioned topology give the SH-aLRT score for that branch, while percentages*  
 371 *following a subset relationship give the proportion of individual partition gene trees supporting the*  
 372 *specified relationship with  $\geq 80$  SH-aLRT*

## 373 Discussion

### 374 Conflict analysis

375 Several contentious relationships show strong contrast between the number of genes supporting the  
 376 relationship, the number of genes *strongly* supporting the relationship ( $>2$  lnL), the lnL supporting the  
 377 relationship, and the lnL of genes that strongly support the relationship. Our analyses demonstrate that  
 378 the differences in the number of gene trees supporting relationships and the difference in the summed  
 379 likelihoods can provide insight into the cause for discordance between concatenated ML analyses  
 380 and coalescent analyses. For example, the relationship involving Gnetales and the conifers as sister  
 381 (Gnetifers) was recovered in coalescent-based analysis and is supported by more genes. However, the sum  
 382 of the differences in the log-likelihoods of alternative resolutions support the Gnepine relationship (i.e.,  
 383 Gnetales sister to Pinales), the relationship found in the ML supermatrix analyses. Other relationships,  
 384 including the placement of *Amborella* (Table 1), unequivocally support *Amborella* as sister to the rest of  
 385 the angiosperms. For some relationships, gene support was equivocal (e.g. for relationships in eudicots  
 386 and Bryophytes), but differences in *strongly* supporting genes and in summed lnL differences showed a  
 387 clear preference.

## 388 **Nested analysis**

389 Filtering genes by the specific relationship they display provides an opportunity to examine nested  
390 conflicts (i.e., subsets of genes that do not conflict in one relationship may conflict in another).  
391 Furthermore, if conflict was reduced as a result of filtering, concatenation may be more tenable on  
392 such a filtered datasets. However, our nested conflict analyses demonstrated significant conflict and  
393 variation in the support for different relationships (Fig. 4) and that filtering genes based on specific  
394 relationships did not reduce conflict in other parts of the tree. While filtering genes may provide some  
395 means for lessening some systematic errors (Brown and Thomson 2016), or reducing some conflict (the  
396 question-specific ‘node-control’ approach of Chen, Liang, and Zhang (2015)) our analyses suggest that  
397 it will not likely solve general problems regarding conflicting genes.

## 398 **A test for the combinability of genes**

399 It is perhaps naïve to expect a single gene to have high support throughout a large part of the Tree of  
400 Life (see Penny et al. (1990); MUTOG: the ‘Myth of a Universal Tree from One Gene’). For this reason,  
401 some researchers have thus argued that concatenating genes effectively combines data informative at  
402 various scales and so provides the necessary information to better resolve deep and shallow nodes (e.g.,  
403 Mirarab, Bayzid, et al. 2014). Despite the potential benefits of concatenation (i.e., amplifying weak  
404 phylogenetic signal), the underlying model of evolution for a concatenated analysis assumes topological  
405 concordance among gene tree histories. Extensive gene conflicts should often violate these assumptions.  
406 Filtering genes could be one means of reducing conflict, though our filtered analyses demonstrated that  
407 conflict remained in other parts of the tree. However, this conflict may have been weak enough to  
408 still support concatenation. Whether genes should be combined for a concatenated analysis has been  
409 discussed at length (Huelsenbeck, Bull, and Cunningham 1996; Leigh et al. 2008; Seo and Thorne 2018;  
410 Theobald 2010; Walker, Brown, and Smith 2018) and Bayesian methods have recently been developed  
411 to address some of these issues (Neupane et al. 2018). However, due to the large scale of genomic  
412 datasets, Bayesian methods are often computationally intractable.

413 We developed a heuristic to test if genes should be combined based on information criteria, and  
414 validated its performance through simulation. Our approach bears some similarity to methods which  
415 test the combinability of partition models in concatenated analyses (Lanfear et al. 2012, 2016), but  
416 additionally considers topological heterogeneity between gene regions, rather than evaluating them on  
417 a fixed topology (Neupane et al. 2018; Seo and Thorne 2018). In some cases the two approaches are  
418 expected to perform similarly. For example, if two genes have identical topologies, then our results and  
419 the results of PartitionFinder should be identical. One key difference lies in the interpretation of the  
420 results. If two genes are not merged in a PartitionFinder-like analysis, they are still included in the  
421 same concatenation analysis, albeit in different partitions. However, if two genes are not clustered by  
422 our approach, we argue that they should not be concatenated at all.

423 Simulations demonstrated that our approach performed well with clustering success decreasing with  
424 increasing tree depth and increasing branch length heterogeneity (Fig. 5). Simply put, trees that  
425 were more different were easier to separate into clusters. Overfitting increased as taxon overlap was  
426 reduced. Based on these results, we find that our method provides a feasible approach to partition  
427 data into combinable subsets and to determine the degree of combinability (or lack thereof) of a set  
428 of genes. Despite the shortcuts employed, however, it may still involve long computational times  
429 or be intractable for some large datasets. Therefore, methods that reduce computational time, for

430 example the training of machine learning discriminative models for metrics like RFW from data subsets,  
431 could be explored. Because of the extensive gene tree conflict within datasets and the improbable  
432 nature of supporting combining genes that differ extensively in topology, generally researchers would  
433 be better to test subsets of the datasets instead of the entire dataset, reducing computational time and  
434 effort extensively. Additionally, the results of our simulations show that different information criteria  
435 and branch length models may be applicable in different situations. For example, AICc with scaled  
436 branch lengths is likely to produce few clusters when gene tree conflict is extensive, while BIC with  
437 scaled branch lengths may produce more. Therefore, researchers wishing to apply our approach should  
438 consider the characteristics of the data they are analyzing when making this choice.

### 439 **Combinability of empirical data**

440 Using our heuristic, we tested combinability of the subset of the genes from Wickett et al. (2014)  
441 that supported magnoliids sister to eudicots as inferred in the original ML analysis. We found that  
442 only a very small set of genes supported concatenation. Because concatenation is a common means  
443 for analyzing large phylogenomic analyses, it may be surprising that our metric does not support  
444 widespread concatenation. However, given the extensive underlying gene tree conflict that remains  
445 even after filtering for a particular focal relationship (Fig. 4) this should be expected. In particular,  
446 simulations demonstrated that our approach using AICc with scaled branch lengths is very sensitive to  
447 topological heterogeneity. Therefore, very small numbers of concatenated sets are probably the result  
448 of the extensive gene tree conflict that remains even after node-specific filtering. Furthermore, it is  
449 notable that even after filtering for gene trees supporting a particular relationships, some concatenated  
450 subsets still did not provide strong support for that relationship. While concatenation can be helpful for  
451 exploratory inference to identify dominant signal, it is not capable of addressing specific and contentious  
452 relationships. We suggest that when exploring specific relationships analyses such as those described  
453 above should be used to uncover the most robust phylogenetic hypothesis upon which to base other  
454 evolutionary hypotheses.

### 455 **Implications for plant phylogenetics**

456 The results presented here provide strong support for several relationships that have long been considered  
457 contentious, and indicate probable resolutions for others. For example, we found support for *Amborella*  
458 being sister to the rest of angiosperms and that gymnosperms are monophyletic. Several relationships  
459 (e.g., among the eudicots and relatives as well as the hornworts, liverworts, and mosses) lack enough  
460 information to confidently accept any of the alternative resolutions. Rather than being dismayed at this  
461 apparent failure, we regard this lack of signal as extremely valuable information, as it informs where  
462 future effort should be focused. Though we identified the relationship that was more strongly supported  
463 by the data (Table 1), the differences between the alternatives were so slight that the current dataset is  
464 likely unable to confidently resolve this debate and conducting additional analyses with expanded taxa  
465 and gene regions is warranted.

466 Among the strongly supported hypotheses, the placement of *Amborella* continues to be a point of  
467 major contention within the plant community. *Amborella* is a tropical tree with relatively small flowers,  
468 while the Nymphaeales are aquatic plants with relatively large flowers. The resolution of these taxa in  
469 relation to the remainder of the flowering plants will inform the life history or early angiosperms (Feild  
470 et al. (2004)) as well as the lability of life history and floral traits. Our results suggest *Amborella* is



471 sister to all other extant angiosperms, and imply that rates of evolution need not be particularly fast in  
472 order to understand the morphological differences between a tropical tree (*Amborella*) and water lilies  
473 (Nymphaeales). Strong support for the monophyly of gymnosperms implies that the morphological  
474 disparity of extant gymnosperm taxa, including the especially diverse Gnetales, emerged post-divergence  
475 from the angiosperm lineage. This reinforces analyses of LEAFY homologs, which recover gymnosperm  
476 paralogs as monophyletic groups (Sayou et al. 2014), and also lends support to shared characteristics  
477 between Gnetales and angiosperms resulting from convergent evolution (Bowe, Coat, and dePamphilis  
478 2000; Hansen et al. 1999).

479 For contentious relationships only weakly supported here, there are several biological questions that  
480 will be answered once these are confidently resolved. The data and analyses presented here suggest  
481 that hornworts are sister to all other land plants. This is consistent with some studies (Nickrent et al.  
482 2000; Nishiyama and Kato 1999), but contradicts the results of others (Cox et al. 2014; Karol et al.  
483 2010; Qiu et al. 2006), including some but not all results of a recent re-analysis of this dataset (Puttick  
484 et al. 2018). If the position of hornworts presented here holds with additional data, it implies that the  
485 absence of stomata in liverworts and some mosses is a derived state resulting from loss of the trait,  
486 suggests a single loss of pyrenoids in non-hornwort land plants (but see Villarreal and Renner 2012),  
487 and questions some inferences on the characteristics of hornwort sporophytes (Qiu et al. 2006). Among  
488 gymnosperms, these data suggest that Gnetales are sister to pines (the “Gnepine” hypothesis; Chaw et  
489 al. 2000), further supporting the lability and rapid evolution of morphological disparity within the  
490 group. Finally, magnoliids are inferred as sister to the eudicot lineages, which has implications on the  
491 origin and divergence times of eudicots and monocots.

492 Despite the ability of the methods explored here to accommodate the underlying gene tree uncertainty,  
493 our results depend on the information available in the underlying dataset. While this dataset is not  
494 comprehensive, it *does* represent extensive sequencing of transcriptomes and genomes for the taxa  
495 included. We can say, with confidence, what these data support or do not support, but different datasets  
496 (e.g., based on different taxa, different homology analyses) may have stronger signal for relationships  
497 that are resolved more equivocally here. We recommend analyzing these future datasets with an eye  
498 toward hypotheses of specific phylogenetic relationships. Our novel approach provides insight into  
499 several of the most contentious relationships across land plants and is broadly applicable among different  
500 groups. Approaches that ascertain the support for alternative resolutions should be used to resolve  
501 contentious branches across the Tree of Life.

## 502 **Implications for future phylogenomic studies**

503 A panacea does not currently exist for phylogenomic analyses. Some researchers aim to determine  
504 the relative support for contentious relationships. Others want to construct a reasonable, if not ideal,  
505 phylogeny for downstream analyses. Others still may be primarily interested in gene trees. Here, we  
506 suggest that more detailed analyses of the gene trees will yield more informative results regarding the  
507 information within a particular dataset and the ability of the dataset to resolve relationships. Our  
508 results also speak to the common analyses conducted on phylogenomic datasets.

509 The underlying conflict identified by many researchers (Wickett et al. 2014; Puttick et al. 2018)  
510 suggests that concatenation, while helpful for identifying the dominant signal, should not be used  
511 to address contentious nodes. Our targeted exploration of the combinability of gene regions found  
512 that very few genes are optimally modelled by concatenation, even when filtering on those genes that

513 support a relationship. However, our analyses of combinability leaves many unanswered questions.  
514 For example, how should we adequately address the problem of low signal when gene tree conflict is  
515 high and concatenation is statistically unsupported? Are genes that are statistically supported to be  
516 analyzed together linked? And perhaps, most importantly, when faced with several clusters of combined  
517 genes, how does one move forward with inference? Some have suggested feeding the clusters into a  
518 coalescent analysis (Mirarab, Bayzid, et al. 2014), however this most likely violates many assumptions  
519 of the coalescent. Alternatively, researchers are faced with multiple species trees. Here, we suggest that  
520 examining each of the dominant relationships in more detailed helps resolve these conflicts, though  
521 additional work is necessary to translate these results to species tree analyses.

522 The most common alternative to concatenation, coalescent species tree approaches, often accommodate  
523 one major source of conflict in gene trees without concatenation, ILS (Mirarab, Reaz, et al. 2014).  
524 However, the most sophisticated model-based coalescent approaches are often not computationally  
525 tractable for phylogenomic analyses because of the large sizes of the datasets (Ané et al. 2006; Boussau  
526 et al. 2013). Instead, most phylogenomic analyses that accommodate ILS use quartet methods (e.g.,  
527 ASTRAL) that, while fast and effective, do not account for multiple sources of conflict and make several  
528 other assumptions that may or may not be reasonable given the dataset (e.g. equal weighting of gene  
529 trees regardless of properties of the underlying genes). Some researchers have suggested filtering the  
530 data to include only those genes that conflict due to ILS (Knowles et al. 2018; Huang et al. 2017) or  
531 that agree with accepted relationships or specific relationships to be tested (Chen, Liang, and Zhang  
532 2015; Doyle et al. 2015; Smith, Brown, and Walker 2018). However, for datasets with a broad scope,  
533 several processes may be at play throughout the phylogeny and it may not be possible to filter based  
534 on a single underlying process.

535 While a single species tree may be necessary for some downstream analyses, these obfuscate the biological  
536 realities that underlie these data. By uncovering the support and lack thereof, we can determine the  
537 limits of our data, identify troublesome phylogenetic relationships that require more attention, and put  
538 to rest debates over specific relationships (at least in regard to specific datasets). The approach we  
539 adopt here is akin to the ‘hypothesis-control’ method of Chen, Liang, and Zhang (2015), but instead  
540 of relying on the results of typical inference on the filtered subsets, we profile the signal for different  
541 resolutions and processes within them. Overall, we suggest that species trees, because of the cacophany  
542 of signal and conflict, are not the best units of analysis for resolving specific relationships. Instead,  
543 analyses which focus on the support for a particular relationship in isolation, without requiring the  
544 data to speak to the full set of relationships in a species tree, should be pursued.

## 545 Acknowledgments

546 This work was supported by funding from NSF DEB 1354048 (J.F.W. and S.A.S.) and NSF AVATOL  
547 1207915 (J.W.B. and S.A.S.). We appreciate comments from Ning Wang, Caroline Parins-Fukuchi,  
548 Diego Alvarado Serrano, Greg Stull, Drew Larson, Hector Fox, and Richie Hodel.

## 549 Literature Cited

550 Ahrenfeldt, Johanne, Carina Skaarup, Henrik Hasman, Anders Gorm Pedersen, Frank Møller Aarestrup,  
551 and Ole Lund. 2017. “Bacterial Whole Genome-Based Phylogeny: Construction of a New Benchmarking  
552 Dataset and Assessment of Some Existing Methods.” *BMC Genomics* 18 (1). BioMed Central: 19.

- 553 Akaike, Hirotogu. 1973. "Information Theory and an Extension of the Maximum Likelihood Principle."  
554 In *Second International Symposium on Information Theory*, edited by Petrov P. N. and Csaki F.,  
555 267–81. Akademiai Kiado.
- 556 Ané, Cécile, Bret Larget, David A Baum, Stacey D Smith, and Antonis Rokas. 2006. "Bayesian  
557 Estimation of Concordance Among Gene Trees." *Molecular Biology and Evolution* 24 (2). Oxford  
558 University Press: 412–26.
- 559 Boussau, Bastien, Gergely J Szöllösi, Laurent Duret, Manolo Gouy, Eric Tannier, and Vincent Daubin.  
560 2013. "Genome-Scale Coestimation of Species and Gene Trees." *Genome Research* 23 (2). Cold Spring  
561 Harbor Lab: 323–30.
- 562 Bowe, L Michelle, Gwénaële Coat, and Claude W. dePamphilis. 2000. "Phylogeny of Seed Plants  
563 Based on All Three Genomic Compartments: Extant Gymnosperms Are Monophyletic and Gnetales'  
564 Closest Relatives Are Conifers." *Proceedings of the National Academy of Sciences* 97 (8). National  
565 Acad Sciences: 4092–7.
- 566 Brown, Jeremy M, and Robert C Thomson. 2016. "Bayes Factors Unmask Highly Variable Information  
567 Content, Bias, and Extreme Influence in Phylogenomic Analyses." *Systematic Biology* 66 (4). Oxford  
568 University Press: 517–30.
- 569 Brown, Joseph W, Joseph F Walker, and Stephen A Smith. 2017. "Phyx: Phylogenetic Tools for Unix."  
570 *Bioinformatics* 33 (12). Oxford University Press: 1886–8.
- 571 Burnham, Kenneth P, and David R Anderson. 2003. *Model Selection and Multimodel Inference: A*  
572 *Practical Information-Theoretic Approach*. Springer Science & Business Media.
- 573 Chaw, Shu-Miaw, Christopher L Parkinson, Yuchang Cheng, Thomas M Vincent, and Jeffrey D  
574 Palmer. 2000. "Seed Plant Phylogeny Inferred from All Three Plant Genomes: Monophyly of Extant  
575 Gymnosperms and Origin of Gnetales from Conifers." *Proceedings of the National Academy of Sciences*  
576 97 (8). National Acad Sciences: 4086–91.
- 577 Chen, Meng-Yun, Dan Liang, and Peng Zhang. 2015. "Selecting Question-Specific Genes to Reduce  
578 Incongruence in Phylogenomics: A Case Study of Jawed Vertebrate Backbone Phylogeny." *Systematic*  
579 *Biology* 64 (6). Oxford University Press: 1104–20.
- 580 Cox, Cymon J., Blaise Li, Peter G. Foster, T. Martin Embley, and Peter Civián. 2014. "Conflicting  
581 Phylogenies for Early Land Plants Are Caused by Composition Biases Among Synonymous Substitutions."  
582 *Systematic Biology* 63 (2). Oxford University Press: 272–79. <http://dx.doi.org/10.1093/sysbio/syt109>.
- 583 Doyle, Vinson P, Randee E Young, Gavin JP Naylor, and Jeremy M Brown. 2015. "Can We Identify  
584 Genes with Increased Phylogenetic Reliability?" *Systematic Biology* 64 (5). Oxford University Press:  
585 824–37.
- 586 Dunn, Casey W, Andreas Hejnl, David Q Matus, Kevin Pang, William E Browne, Stephen A Smith,  
587 Elaine Seaver, et al. 2008. "Broad Phylogenomic Sampling Improves Resolution of the Animal Tree of  
588 Life." *Nature* 452 (7188). Nature Publishing Group: 745.
- 589 Edwards, Anthony William Fairbank. 1984. *Likelihood*. CUP Archive.
- 590 Edwards, Scott V. 2009. "Is a New and General Theory of Molecular Systematics Emerging?" *Evolution*  
591 63 (1). Wiley Online Library: 1–19.

- 592 Edwards, Scott V, Liang Liu, and Dennis K Pearl. 2007. "High-Resolution Species Trees Without  
593 Concatenation." *Proceedings of the National Academy of Sciences* 104 (14). National Acad Sciences:  
594 5936–41.
- 595 Edwards, Scott V, Zhenxiang Xi, Axel Janke, Brant C Faircloth, John E McCormack, Travis C Glenn,  
596 Bojian Zhong, et al. 2016. "Implementing and Testing the Multispecies Coalescent Model: A Valuable  
597 Paradigm for Phylogenomics." *Molecular Phylogenetics and Evolution* 94. Elsevier: 447–62.
- 598 Feild, Taylor S, Nan Crystal Arens, James A Doyle, Todd E Dawson, and Michael J Donoghue. 2004.  
599 "Dark and Disturbed: A New Image of Early Angiosperm Ecology." *Paleobiology* 30 (1). BioOne:  
600 82–107.
- 601 Feuda, Roberto, Martin Dohrmann, Walker Pett, Hervé Philippe, Omar Rota-Stabelli, Nicolas Lartillot,  
602 Gert Wörheide, and Davide Pisani. 2017. "Improved Modeling of Compositional Heterogeneity Supports  
603 Sponges as Sister to All Other Animals." *Current Biology* 27 (24). Elsevier: 3864–70.
- 604 Fletcher, William, and Ziheng Yang. 2009. "INDELible: A Flexible Simulator of Biological Sequence  
605 Evolution." *Molecular Biology and Evolution* 26 (8). SMOE: 1879–88.
- 606 Guindon, Stéphane, Jean-François Dufayard, Vincent Lefort, Maria Anisimova, Wim Hordijk, and  
607 Olivier Gascuel. 2010. "New Algorithms and Methods to Estimate Maximum-Likelihood Phylogenies:  
608 Assessing the Performance of Phyml 3.0." *Systematic Biology* 59 (3). Oxford University Press: 307–21.
- 609 Hansen, Andrea, Sabine Hansmann, Tahir Samigullin, Andrey Antonov, and William Martin. 1999.  
610 "Gnetum and the Angiosperms: Molecular Evidence That Their Shared Morphological Characters Are  
611 Convergent, Rather Than Homologous." *Molecular Biology and Evolution* 16 (7). Oxford University  
612 Press: 1006–6.
- 613 Hedges, S Blair, Joel Dudley, and Sudhir Kumar. 2006. "TimeTree: A Public Knowledge-Base of  
614 Divergence Times Among Organisms." *Bioinformatics* 22 (23). Oxford University Press: 2971–2.
- 615 Hedges, S. Blair, Julie Marin, Michael Suleski, Madeline Paymer, and Sudhir Kumar. 2015. "Tree  
616 of Life Reveals Clock-Like Speciation and Diversification." *Molecular Biology and Evolution* 32 (4):  
617 835–45. <https://doi.org/10.1093/molbev/msv037>.
- 618 Huang, Huateng, Jeet Sukumaran, Stephen A Smith, and Lacey Knowles. 2017. "Cause of Gene  
619 Tree Discord? Distinguishing Incomplete Lineage Sorting and Lateral Gene Transfer in Phylogenetics."  
620 *PeerJ PrePrints* 5. PeerJ, Inc.: e3489v1.
- 621 Huelsenbeck, John P, JJ Bull, and Clifford W Cunningham. 1996. "Combining Data in Phylogenetic  
622 Analysis." *Trends in Ecology & Evolution* 11 (4). Elsevier: 152–58.
- 623 Jarvis, Erich D, Siavash Mirarab, Andre J Aberer, Bo Li, Peter Houde, Cai Li, Simon YW Ho, et al.  
624 2014. "Whole-Genome Analyses Resolve Early Branches in the Tree of Life of Modern Birds." *Science*  
625 346 (6215). American Association for the Advancement of Science: 1320–31.
- 626 Kalyaanamoorthy, Subha, Bui Quang Minh, Thomas KF Wong, Arndt von Haeseler, and Lars S Jermin.  
627 2017. "ModelFinder: Fast Model Selection for Accurate Phylogenetic Estimates." *Nature Methods* 14  
628 (6). Nature Publishing Group: 587.
- 629 Karol, Kenneth G., Kathiravetpillai Arumuganathan, Jeffrey L. Boore, Aaron M. Duffy, Karin DE  
630 Everett, John D. Hall, S. Kellon Hansen, et al. 2010. "Complete Plastome Sequences of Equisetum

- 631 Arvense and Isoetes Flaccida: Implications for Phylogeny and Plastid Genome Evolution of Early Land  
632 Plant Lineages.” *BMC Evolutionary Biology* 10 (1): 321. <https://doi.org/10.1186/1471-2148-10-321>.
- 633 Kluge, Arnold G. 1989. “A Concern for Evidence and a Phylogenetic Hypothesis of Relationships  
634 Among Epicrates (Boidae, Serpentes).” *Systematic Biology* 38 (1). Society of Systematic Zoology: 7–25.
- 635 Knowles, L Lacey, Huateng Huang, Jeet Sukumaran, and Stephen A Smith. 2018. “A Matter of  
636 Phylogenetic Scale: Distinguishing Incomplete Lineage Sorting from Lateral Gene Transfer as the Cause  
637 of Gene Tree Discord in Recent Versus Deep Diversification Histories.” *American Journal of Botany*  
638 105 (3). Wiley Online Library: 376–84.
- 639 Kosakovsky Pond, Sergei L, David Posada, Michael B Gravenor, Christopher H Woelk, and Simon  
640 DW Frost. 2006a. “Automated Phylogenetic Detection of Recombination Using a Genetic Algorithm.”  
641 *Molecular Biology and Evolution* 23 (10). Oxford University Press: 1891–1901.
- 642 ———. 2006b. “GARD: A Genetic Algorithm for Recombination Detection.” *Bioinformatics* 22 (24).  
643 Oxford University Press: 3096–8.
- 644 Lanfear, Robert, Brett Calcott, Simon YW Ho, and Stephane Guindon. 2012. “PartitionFinder:  
645 Combined Selection of Partitioning Schemes and Substitution Models for Phylogenetic Analyses.”  
646 *Molecular Biology and Evolution* 29 (6). Oxford University Press: 1695–1701.
- 647 Lanfear, Robert, Paul B Frandsen, April M Wright, Tereza Senfeld, and Brett Calcott. 2016. “Partition-  
648 Finder 2: New Methods for Selecting Partitioned Models of Evolution for Molecular and Morphological  
649 Phylogenetic Analyses.” *Molecular Biology and Evolution* 34 (3). Oxford University Press: 772–73.
- 650 Leigh, Jessica W, Edward Susko, Manuela Baumgartner, and Andrew J Roger. 2008. “Testing  
651 Congruence in Phylogenomic Analysis.” *Systematic Biology* 57 (1). Taylor & Francis: 104–15.
- 652 Liu, Liang, Lili Yu, Dennis K Pearl, and Scott V Edwards. 2009. “Estimating Species Phylogenies  
653 Using Coalescence Times Among Sequences.” *Systematic Biology* 58 (5). Oxford University Press:  
654 468–77.
- 655 Maddison, Wayne P. 1997. “Gene Trees in Species Trees.” *Systematic Biology* 46 (3). Oxford University  
656 Press: 523–36.
- 657 Mirarab, Siavash, Md Shamsuzzoha Bayzid, Bastien Boussau, and Tandy Warnow. 2014. “Statistical  
658 Binning Enables an Accurate Coalescent-Based Estimation of the Avian Tree.” *Science* 346 (6215).  
659 American Association for the Advancement of Science: 1250463.
- 660 Mirarab, Siavash, Rezwana Reaz, Md S Bayzid, Théo Zimmermann, M Shel Swenson, and Tandy  
661 Warnow. 2014. “ASTRAL: Genome-Scale Coalescent-Based Species Tree Estimation.” *Bioinformatics*  
662 30 (17). Oxford University Press: i541–i548.
- 663 Neupane, Suman, Karolina Fucikova, Louise A Lewis, Lynn Kuo, Ming-Hui Chen, and Paul Lewis.  
664 2018. “Assessing Combinability of Phylogenomic Data Using Bayes Factors.” *bioRxiv*. Cold Spring  
665 Harbor Laboratory, 250969.
- 666 Nguyen, Lam-Tung, Heiko A Schmidt, Arndt von Haeseler, and Bui Quang Minh. 2014. “IQ-Tree: A  
667 Fast and Effective Stochastic Algorithm for Estimating Maximum-Likelihood Phylogenies.” *Molecular*  
668 *Biology and Evolution* 32 (1). Oxford University Press: 268–74.
- 669 Nickrent, Daniel L., Christopher L. Parkinson, Jeffrey D. Palmer, and R. Joel Duff. 2000. “Multigene  
670 Phylogeny of Land Plants with Special Reference to Bryophytes and the Earliest Land Plants.” *Molecular*

- 671 *Biology and Evolution* 17 (12): 1885–95. <https://doi.org/10.1093/oxfordjournals.molbev.a026290>.
- 672 Nishiyama, T, and M Kato. 1999. “Molecular Phylogenetic Analysis Among Bryophytes and Tracheo-  
673 phytes Based on Combined Data of Plastid Coded Genes and the 18S rRNA Gene.” *Molecular Biology*  
674 *and Evolution* 16 (8): 1027–36. <https://doi.org/10.1093/oxfordjournals.molbev.a026192>.
- 675 Penny, D, MD Hendy, EA Zimmer, and RK Hamby. 1990. “Trees from Sequences: Panacea or Pandora’s  
676 Box?” *Australian Systematic Botany* 3 (1). CSIRO: 21–38.
- 677 Puttick, Mark N, Jennifer L Morris, Tom A Williams, Cymon J Cox, Dianne Edwards, Paul Kenrick,  
678 Silvia Pressel, et al. 2018. “The Interrelationships of Land Plants and the Nature of the Ancestral  
679 Embryophyte.” *Current Biology* 28 (5). Elsevier: 733–45.
- 680 Qiu, Yin-Long, Libo Li, Bin Wang, Zhiduan Chen, Volker Knoop, Milena Groth-Malonek, Olena  
681 Dombrowska, et al. 2006. “The Deepest Divergences in Land Plants Inferred from Phylogenomic  
682 Evidence.” *Proceedings of the National Academy of Sciences* 103 (42). National Academy of Sciences:  
683 15511–6. <https://doi.org/10.1073/pnas.0603335103>.
- 684 Robinson, David F, and Leslie R Foulds. 1981. “Comparison of Phylogenetic Trees.” *Mathematical*  
685 *Biosciences* 53 (1-2). Elsevier: 131–47.
- 686 Sauquet, Hervé, Maria von Balthazar, Susana Magallón, James A Doyle, Peter K Endress, Emily J  
687 Bailes, Erica Barroso de Morais, et al. 2017. “The Ancestral Flower of Angiosperms and Its Early  
688 Diversification.” *Nature Communications* 8. Nature Publishing Group: 16047.
- 689 Sayou, Camille, Marie Monniaux, Max H Nanao, Edwige Moyroud, Samuel F Brockington, Emmanuel  
690 Thévenon, Hicham Chahtane, et al. 2014. “A Promiscuous Intermediate Underlies the Evolution of  
691 Leafy Dna Binding Specificity.” *Science* 343 (6171). American Association for the Advancement of  
692 Science: 645–48.
- 693 Schwarz, Gideon. 1978. “Estimating the Dimension of a Model.” *The Annals of Statistics* 6 (2).  
694 Institute of Mathematical Statistics: 461–64.
- 695 Seo, Tae-Kun, and Jeffrey L Thorne. 2018. “Information Criteria for Comparing Partition Schemes.”  
696 *Systematic Biology* 67 (4): 616–32. <https://doi.org/10.1093/sysbio/syx097>.
- 697 Shen, Xing-Xing, Chris Todd Hittinger, and Antonis Rokas. 2017. “Contentious Relationships in  
698 Phylogenomic Studies Can Be Driven by a Handful of Genes.” *Nature Ecology & Evolution* 1 (5).  
699 Nature Publishing Group: 0126.
- 700 Shen, Xing-Xing, Xiaofan Zhou, Jacek Kominek, Cletus P Kurtzman, Chris Todd Hittinger, and  
701 Antonis Rokas. 2016. “Reconstructing the Backbone of the Saccharomycotina Yeast Phylogeny Using  
702 Genome-Scale Data.” *G3: Genes, Genomes, Genetics* 6 (12). G3: Genes, Genomes, Genetics: 3927–39.
- 703 Simion, Paul, Hervé Philippe, Denis Baurain, Muriel Jager, Daniel J. Richter, Arnaud Di Franco,  
704 Béatrice Roure, et al. 2017. “A Large and Consistent Phylogenomic Dataset Supports Sponges as  
705 the Sister Group to All Other Animals.” *Current Biology* 27 (7): 958–67. <https://doi.org/https://doi.org/10.1016/j.cub.2017.02.031>.
- 706
- 707 Smith, Stephen A, Joseph W Brown, and Joseph F Walker. 2018. “So Many Genes, so Little Time: A  
708 Practical Approach to Divergence-Time Estimation in the Genomic Era.” *PloS One* 13 (5). Public  
709 Library of Science: e0197433.

- 710 Smith, Stephen A, Michael J Moore, Joseph W Brown, and Ya Yang. 2015. “Analysis of Phylogenomic  
711 Datasets Reveals Conflict, Concordance, and Gene Duplications with Examples from Animals and  
712 Plants.” *BMC Evolutionary Biology* 15 (1). BioMed Central: 150.
- 713 Solís-Lemus, Cécile, Claudia AND Ané. 2016. “Inferring Phylogenetic Networks with Maximum  
714 Pseudolikelihood Under Incomplete Lineage Sorting.” *PLOS Genetics* 12 (3). Public Library of Science:  
715 1–21. <https://doi.org/10.1371/journal.pgen.1005896>.
- 716 Springer, Mark S, and John Gatesy. 2016. “The Gene Tree Delusion.” *Molecular Phylogenetics and  
717 Evolution* 94. Elsevier: 1–33.
- 718 Theobald, Douglas L. 2010. “A Formal Test of the Theory of Universal Common Ancestry.” *Nature*  
719 465 (7295). Nature Publishing Group: 219.
- 720 Villarreal, Juan Carlos, and Susanne S Renner. 2012. “Hornwort Pyrenoids, Carbon-Concentrating  
721 Structures, Evolved and Were Lost at Least Five Times During the Last 100 Million Years.” *Proceedings  
722 of the National Academy of Sciences* 109 (46). National Acad Sciences: 18873–8.
- 723 Walker, Joseph F, Joseph W Brown, and Stephen A Smith. 2018. “Analyzing Contentious Relationships  
724 and Outlier Genes in Phylogenomics.” *Systematic Biology* syy043. Oxford University Press. <https://doi.org/10.1093/sysbio/syy043>.
- 726 Walker, Joseph F, Ya Yang, Tao Feng, Alfonso Timoneda, Jessica Mikenas, Vera Hutchison, Caroline  
727 Edwards, et al. 2018. “From Cacti to Carnivores: Improved Phylotranscriptomic Sampling and  
728 Hierarchical Homology Inference Provide Further Insight into the Evolution of Caryophyllales.” *American  
729 Journal of Botany* 105 (3). Wiley Online Library: 446–62.
- 730 Walker, Joseph F, Ya Yang, Michael J Moore, Jessica Mikenas, Alfonso Timoneda, Samuel F Brockington,  
731 and Stephen A Smith. 2017. “Widespread Paleopolyploidy, Gene Tree Conflict, and Recalcitrant  
732 Relationships Among the Carnivorous Caryophyllales.” *American Journal of Botany* 104 (6). Botanical  
733 Soc America: 858–67.
- 734 Wen, Dingqiao, Yun Yu, Jiafan Zhu, and Luay Nakhleh. 2018. “Inferring Phylogenetic Networks Using  
735 Phylonet.” *Systematic Biology* 67 (4): 735–40. <https://doi.org/10.1093/sysbio/syy015>.
- 736 Whelan, Nathan V, Kevin M Kocot, Tatiana P Moroz, Krishanu Mukherjee, Peter Williams, Gustav  
737 Paulay, Leonid L Moroz, and Kenneth M Halanynch. 2017. “Ctenophore Relationships and Their  
738 Placement as the Sister Group to All Other Animals.” *Nature Ecology & Evolution* 1 (11). Nature  
739 Publishing Group: 1737.
- 740 Wickett, Norman J, Siavash Mirarab, Nam Nguyen, Tandy Warnow, Eric Carpenter, Naim Matasci,  
741 Saravanaraj Ayyampalayam, et al. 2014. “Phylotranscriptomic Analysis of the Origin and Early  
742 Diversification of Land Plants.” *Proceedings of the National Academy of Sciences* 111 (45). National  
743 Acad Sciences: E4859–E4868.
- 744 Xi, Zhenxiang, Liang Liu, Joshua S Rest, and Charles C Davis. 2014. “Coalescent Versus Concatenation  
745 Methods and the Placement of Amborella as Sister to Water Lilies.” *Systematic Biology* 63 (6). Oxford  
746 University Press: 919–32.
- 747 Yang, Ya, and Stephen A Smith. 2014. “Orthology Inference in Nonmodel Organisms Using Transcrip-  
748 tomes and Low-Coverage Genomes: Improving Accuracy and Matrix Occupancy for Phylogenomics.”  
749 *Molecular Biology and Evolution* 31 (11). Oxford University Press: 3081–92.
